# Supplementary material for: Identification of clustered microRNAs using an ab initio prediction method
Source: PubMed Central journal article supplement (PMC1315341; doi:10.1186/1471-2105-6-267), 2005-11-07
Supplement: 1471-2105-6-267-S1.pdf [file 1471-2105-6-267-S1.pdf]

| Name  | Chromosome | Genomic coordinates   | SVM score | Cloning | Conservation |     |     | Closest miRNA  | Other predictions  |
|-------|------------|-----------------------|-----------|---------|--------------|-----|-----|----------------|--------------------|
| HP-1  | chr1       | 40887341-40887436,+   | 3.02      | -       | -            | -   | -   | hsa-mir-30e    |                    |
| HP-2  | chr1       | 40898684-40898762,+   | 0.44      | -       | -            | -   | -   | hsa-mir-30c-1  |                    |
| HP-3  | chr1       | 65232147-65232234,-   | 2.72      | -       | -            | -   | -   | hsa-mir-101-1  |                    |
| HP-4  | chr1       | 98222840-98222917,-   | 0.48      | -       | m r          | m r | r   | hsa-mir-137    | B648               |
| HP-5  | chr1       | 153211595-153211689,- | 0.95      | -       | -            | -   | -   | hsa-mir-9-1    |                    |
| HP-6  | chr2       | 136262939-136263027,+ | 0.06      | -       | -            | -   | -   | hsa-mir-128a   |                    |
| HP-7  | chr2       | 176831714-176831785,+ | 0.04      | -       | -            | -   | -   | hsa-mir-10b    |                    |
| HP-8  | chr3       | 37982219-37982304,+   | 0.46      | -       | -            | -   | -   | hsa-mir-26a-1  |                    |
| HP-9  | chr3       | 161610634-161610741,+ | 0.10      | -       | -            | -   | -   | hsa-mir-16-2   |                    |
| HP-10 | chr5       | 54503853-54503934,-   | 2.09      | -       | -            | -   | -   | hsa-mir-449    |                    |
| HP-11 | chr5       | 148785556-148785635,+ | 1.21      | -       | -            | -   | -   | hsa-mir-143    |                    |
| HP-12 | chr5       | 179377228-179377312,- | 0.11      | -       | -            | -   | -   | hsa-mir-340    |                    |
| HP-13 | chr6       | 52127783-52127846,+   | 0.44      | -       | -            | -   | -   | hsa-mir-133b   |                    |
| HP-14 | chr6       | 72141346-72141459,-   | 0.74      | -       | m r          | r   | -   | hsa-mir-30c-2  |                    |
| HP-15 | chr7       | 129017934-129018046,- | 4.42      | -       | m            | m   | -   | hsa-mir-183    |                    |
| HP-16 | chr7       | 129722221-129722300,+ | 0.58      | -       | m            | -   | -   | hsa-mir-335    |                    |
| HP-17 | chr8       | 141804157-141804256,- | 2.00      | -       | -            | -   | -   | hsa-mir-151    |                    |
| HP-18 | chr8       | 141813107-141813217,- | 0.09      | -       | -            | -   | -   | hsa-mir-151    |                    |
| HP-19 | chr9       | 120085235-120085329,- | 0.50      | -       | -            | -   | -   | hsa-mir-147    |                    |
| HP-20 | chr11      | 553994-554064,-       | 0.31      | -       | -            | -   | -   | hsa-mir-210    |                    |
| HP-21 | chr11      | 559747-559827,-       | 0.82      | -       | -            | -   | -   | hsa-mir-210    |                    |
| HP-22 | chr11      | 74715663-74715760,-   | 1.78      | -       | m            | m   | -   | hsa-mir-326    |                    |
| HP-23 | chr11      | 74716123-74716211,-   | 2.05      | -       | -            | -   | -   | hsa-mir-326    |                    |
| HP-24 | chr11      | 74716486-74716607,-   | 0.44      | -       | m r          | -   | -   | hsa-mir-326    |                    |
| HP-25 | chr11      | 121485215-121485296,- | 2.41      | -       | -            | -   | -   | hsa-mir-125b-1 |                    |
| HP-26 | chr11      | 121528013-121528085,- | 0.47      | -       | -            | -   | -   | hsa-mir-100    |                    |
| HP-27 | chr12      | 52668365-52668434,+   | 0.85      | -       | -            | -   | -   | hsa-mir-196a-2 |                    |
| HP-28 | chr13      | 49519429-49519510,-   | 0.81      | -       | -            | -   | -   | hsa-mir-16-1   |                    |
| HP-29 | chr14      | 99636013-99636131,+   | 0.85      | -       | -            | -   | -   | hsa-mir-342    |                    |
| HP-30 | chr14      | 100405160-100405230,+ | 0.12      | h       | m r          | m r | -   | hsa-mir-337    | B202, X52          |
| HP-31 | chr14      | 100420573-100420666,+ | 1.27      | h       | m            | m   | -   | hsa-mir-136    |                    |
| HP-32 | chr14      | 100447566-100447644,+ | 0.42      | -       | -            | -   | -   | hsa-mir-370    |                    |
| HP-33 | chr14      | 100562875-100562954,+ | 1.29      | h       | m r          | m r | -   | hsa-mir-323    | ANMH46             |
| HP-34 | chr14      | 100563199-100563264,+ | 0.25      | h       | -            | -   | -   | hsa-mir-323    |                    |
| HP-35 | chr14      | 100565724-100565804,+ | 1.40      | h       | m r          | m r | r   | hsa-mir-323    | B209, X61          |
| HP-36 | chr14      | 100569845-100569926,+ | 1.67      | -       | m r          | m r | r   | hsa-mir-368    | X124               |
| HP-37 | chr14      | 100576159-100576238,+ | 1.31      | h       | m r          | m r | m r | hsa-mir-368    |                    |
| HP-38 | chr14      | 100576535-100576620,+ | 0.98      | -       | m r          | m r | m r | hsa-mir-376a   | ANMH47, X205       |
| HP-39 | chr14      | 100580290-100580371,+ | 0.93      | -       | -            | -   | -   | hsa-mir-381    |                    |
| HP-40 | chr14      | 100582545-100582628,+ | 1.28      | h       | m r          | m r | -   | hsa-mir-381    | B212, X199         |
| HP-41 | chr14      | 100583411-100583488,+ | 1.17      | h       | m r          | m r | m   | hsa-mir-381    | B213, X177         |
| HP-42 | chr14      | 100584748-100584838,+ | 0.30      | h       | m r          | m r | m r | hsa-mir-381    | B214               |
| HP-43 | chr14      | 100585651-100585730,+ | 1.10      | -       | -            | -   | -   | hsa-mir-381    |                    |
| HP-44 | chr14      | 100588536-100588615,+ | 1.11      | h       | m r          | m r | m   | hsa-mir-382    |                    |
| HP-45 | chr14      | 100591505-100591585,+ | 1.41      | m       | m r          | m r | m   | hsa-mir-134    | ANMH51, B217, X23  |
| HP-46 | chr14      | 100596673-100596749,+ | 1.34      | -       | m r          | m r | m r | hsa-mir-154    | ANMH53, B219, X161 |
| HP-47 | chr14      | 100601390-100601468,+ | 0.74      | h m     | m r          | m r | -   | hsa-mir-369    | ANMH55, B221       |
| HP-48 | chr14      | 100601548-100601614,+ | 0.18      | m       | m r          | m r | -   | hsa-mir-369    | ANMH56             |
| HP-49 | chr14      | 100602002-100602081,+ | 0.78      | h m     | m r          | m r | m r | hsa-mir-369    | ANMH57, B565, X26  |
| HP-50 | chr15      | 29148489-29148618,-   | 1.15      | -       | m            | -   | -   | hsa-mir-211    |                    |
| HP-51 | chr15      | 61945887-61945958,-   | 0.69      | -       | -            | -   | -   | hsa-mir-422a   |                    |
| HP-52 | chr15      | 61956585-61956672,-   | 1.23      | -       | -            | -   | -   | hsa-mir-422a   |                    |
| HP-53 | chr15      | 77283739-77283834,+   | 2.79      | -       | -            | -   | -   | hsa-mir-184    |                    |
| HP-54 | chr15      | 77286586-77286662,+   | 0.19      | -       | -            | -   | -   | hsa-mir-184    |                    |
| HP-55 | chr15      | 86952348-86952421,+   | 0.43      | -       | r            | r   | -   | hsa-mir-7-2    |                    |
| HP-56 | chr16      | 14305325-14305407,+   | 1.25      | h       | m            | m   | m   | hsa-mir-365-1  | B707               |
| HP-57 | chr16      | 55455432-55455558,+   | 8.08      | -       | m            | m   | -   | hsa-mir-138-2  |                    |
| HP-58 | chr16      | 65802725-65802850,-   | 1.03      | -       | r            | -   | -   | hsa-mir-328    |                    |
| HP-59 | chr17      | 1557905-1558005,-     | 2.40      | -       | r            | r   | -   | hsa-mir-22     |                    |
| HP-60 | chr17      | 7077268-7077349,-     | 0.04      | -       | -            | -   | -   | hsa-mir-324    |                    |
| HP-61 | chr17      | 24212514-24212583,-   | 0.83      | h m     | m r          | m r | m r | hsa-mir-144    | ANMH67, B919, X65  |

|       |       |                       |      |     |     |     |   |                |                   |
|-------|-------|-----------------------|------|-----|-----|-----|---|----------------|-------------------|
| HP-62 | chr17 | 26925895-26925998,+   | 0.15 | -   | -   | -   | - | hsa-mir-365-2  |                   |
| HP-63 | chr17 | 54574700-54574820,-   | 4.57 | -   | -   | -   | - | hsa-mir-301    |                   |
| HP-64 | chr17 | 54583611-54583698,-   | 1.96 | -   | m   | -   | - | hsa-mir-301    |                   |
| HP-65 | chr17 | 55276486-55276565,+   | 1.08 | -   | -   | -   | - | hsa-mir-21     |                   |
| HP-66 | chr17 | 76710147-76710253,-   | 0.16 | -   | -   | -   | - | hsa-mir-338    |                   |
| HP-67 | chr18 | 54262074-54262128,+   | 0.20 | -   | -   | -   | - | hsa-mir-122a   |                   |
| HP-68 | chr19 | 10794434-10794541,-   | 4.81 | -   | m r | m   | - | hsa-mir-199a-1 |                   |
| HP-69 | chr19 | 50828807-50828889,-   | 1.45 | -   | -   | -   | - | hsa-mir-330    |                   |
| HP-70 | chr19 | 58987053-58987142,+   | 0.42 | -   | -   | -   | - | hsa-mir-373    |                   |
| HP-71 | chr19 | 58991703-58991827,+   | 4.12 | -   | m r | m r | m | hsa-mir-373    |                   |
| HP-72 | chr20 | 61288007-61288074,+   | 0.01 | -   | -   | -   | - | hsa-mir-124a-3 |                   |
| HP-73 | chr20 | 16826662-16826746,+   | 0.07 | -   | -   | -   | - | hsa-mir-99a    |                   |
| HP-74 | chr21 | 25875807-25875895,+   | 0.52 | -   | -   | -   | - | hsa-mir-155    |                   |
| HP-75 | chr22 | 18387174-18387296,+   | 5.67 | -   | m   | m   | - | hsa-mir-185    |                   |
| HP-76 | chrX  | 49466772-49466857,+   | 0.09 | -   | -   | -   | - | hsa-mir-188    |                   |
| HP-77 | chrX  | 49476605-49476676,+   | 0.32 | h m | m r | m r | - | hsa-mir-188    | B121, X144        |
| HP-78 | chrX  | 49477366-49477449,+   | 0.20 | -   | m r | m r | m | hsa-mir-188    | B122              |
| HP-79 | chrX  | 65017860-65017962,+   | 0.81 | -   | -   | -   | - | hsa-mir-223    |                   |
| HP-80 | chrX  | 73289960-73290065,-   | 2.01 | h   | m r | -   | - | hsa-mir-374    |                   |
| HP-81 | chrX  | 84968305-84968369,-   | 0.14 | -   | -   | -   | - | hsa-mir-361    |                   |
| HP-82 | chrX  | 113872348-113872431,+ | 0.28 | -   | m r | m   | - | hsa-mir-448    |                   |
| HP-83 | chrX  | 122415494-122415578,- | 0.39 | -   | -   | -   | - | hsa-mir-220    |                   |
| HP-84 | chrX  | 133019128-133019229,- | 1.95 | -   | -   | -   | - | hsa-mir-92-2   |                   |
| HP-85 | chrX  | 133028921-133029009,- | 1.14 | h m | m r | m r | - | hsa-mir-92-2   | ANMH3, B343, X211 |
| HP-86 | chrX  | 133400068-133400148,- | 1.59 | h   | m r | m r | - | hsa-mir-450    | X138              |
| HP-87 | chrX  | 133405878-133405948,- | 0.80 | h   | m r | m r | - | hsa-mir-424    | B973, X141        |
| HP-88 | chrX  | 150798672-150798748,- | 1.02 | h   | m   | m   | - | hsa-mir-224    | AMH1, X154        |
| HP-89 | chrX  | 151232472-151232559,- | 2.56 | -   | m r | m   | - | hsa-mir-105-2  |                   |
