# Supplementary material for: Identification of clustered microRNAs using an ab initio prediction method
Source: PubMed Central journal article supplement (PMC1315341; doi:10.1186/1471-2105-6-267), 2005-11-07
Supplement: 1471-2105-6-267-S2.pdf [file 1471-2105-6-267-S2.pdf]

| Name  | Chromosome   | Genomic coordinates   | SVM score | Cloning | Conservation |     |     | Closest miRNA  | Other predictions |
|-------|--------------|-----------------------|-----------|---------|--------------|-----|-----|----------------|-------------------|
| MP-1  | chr1         | 132070573-132070662,+ | 0.15      | -       | r            | r   | -   | mmu-mir-135b   |                   |
| MP-2  | chr1         | 194939223-194939296,+ | 0.97      | -       | r            | r   | -   | mmu-mir-29c    |                   |
| MP-3  | chr2         | 38822522-38822594,+   | 0.05      | -       | -            | -   | -   | mmu-mir-181b-2 |                   |
| MP-4  | chr3         | 88712241-88712321,+   | 0.5       | -       | h r          | h r | -   | mmu-mir-9-1    |                   |
| MP-5  | chr3         | 128025558-128025632,+ | 0.78      | h m     | h            | h   | -   | mmu-mir-302    |                   |
| MP-6  | chr3         | 158156790-158156878,+ | 0.53      | -       | r            | -   | -   | mmu-mir-186    |                   |
| MP-7  | chr4         | 56172443-56172536,-   | 0.01      | -       | r            | r   | -   | mmu-mir-32     |                   |
| MP-8  | chr4         | 99698758-99698875,-   | 0.16      | -       | h r          | h r | h r | mmu-mir-101a   |                   |
| MP-9  | chr5         | 135550619-135550746,- | 0.34      | -       | r            | -   | -   | mmu-mir-106b   |                   |
| MP-10 | chr6         | 30049436-30049516,-   | 0.11      | -       | -            | -   | -   | mmu-mir-182    |                   |
| MP-11 | chr6         | 30053316-30053400,-   | 0.6       | -       | r            | r   | -   | mmu-mir-96     |                   |
| MP-12 | chr6         | 30937279-30937355,-   | 0.99      | -       | -            | -   | -   | mmu-mir-29a    |                   |
| MP-13 | chr6         | 30948760-30948857,-   | 0.5       | -       | -            | -   | -   | mmu-mir-29b-1  |                   |
| MP-14 | chr6         | 51213052-51213135,-   | 0.06      | -       | -            | -   | -   | mmu-mir-148a   |                   |
| MP-15 | chr6         | 125337858-125337931,- | 0.42      | -       | -            | -   | -   | mmu-mir-200c   |                   |
| MP-16 | chr7         | 32507703-32507775,+   | 0.08      | -       | -            | -   | -   | mmu-mir-150    |                   |
| MP-17 | chr7         | 51204065-51204177,+   | 2.15      | -       | h r          | r   | -   | mmu-mir-211    |                   |
| MP-18 | chr7         | 88830215-88830288,+   | 0.31      | -       | r            | r   | -   | mmu-mir-139    |                   |
| MP-19 | chr7         | 127610625-127610714,- | 0.62      | -       | r            | r   | -   | mmu-mir-202    |                   |
| MP-20 | chr8         | 83456359-83456470,-   | 2.76      | -       | h r          | r   | -   | mmu-mir-181c   |                   |
| MP-21 | chr8         | 83472287-83472363,+   | 0.15      | -       | r            | r   | -   | mmu-mir-23a    |                   |
| MP-22 | chr8         | 83488943-83489033,+   | 1.76      | -       | h r          | h   | -   | mmu-mir-24-2   |                   |
| MP-23 | chr9         | 106115667-106115762,+ | 0.11      | -       | -            | -   | -   | mmu-let-7g     |                   |
| MP-24 | chr10        | 127120840-127120960,+ | 0.9       | m       | r            | -   | -   | mmu-mir-26a-2  |                   |
| MP-25 | chr11        | 43005924-43005996,-   | 0.69      | -       | r            | r   | -   | mmu-mir-146    |                   |
| MP-26 | chr11        | 49702031-49702111,+   | 0.34      | -       | -            | -   | -   | mmu-mir-340    |                   |
| MP-27 | chr11        | 77681078-77681174,+   | 0.02      | -       | h r          | r   | -   | mmu-mir-144    |                   |
| MP-28 | chr11        | 77685721-77685807,+   | 1.19      | h m     | h r          | h r | h r | mmu-mir-144    | X65               |
| MP-29 | chr11        | 96515423-96515539,+   | 3         | -       | h r          | h   | -   | mmu-mir-152    |                   |
| MP-30 | chr11        | 96523412-96523475,+   | 0.04      | -       | -            | -   | -   | mmu-mir-152    |                   |
| MP-31 | chr12        | 103597091-103597166,+ | 0.45      | -       | r            | r   | -   | mmu-mir-345    |                   |
| MP-32 | chr12        | 104329614-104329696,+ | 1.47      | -       | h r          | h r | r   | mmu-mir-337    | B202, X52         |
| MP-33 | chr12        | 104334262-104334328,+ | 0.18      | m       | r            | r   | r   | mmu-mir-337    |                   |
| MP-34 | chr12        | 104342700-104342775,+ | 0.61      | m       | r            | r   | -   | mmu-mir-136    |                   |
| MP-35 | chr12        | 104463492-104463576,+ | 1.89      | m       | h r          | h r | h r | mmu-mir-329    | X61               |
| MP-36 | chr12        | 104463885-104463947,+ | 0.37      | -       | h r          | h r | -   | mmu-mir-329    |                   |
| MP-37 | chr12        | 104465432-104465507,+ | 0.41      | m       | h r          | h r | r   | mmu-mir-329    | B210, X202        |
| MP-38 | chr12        | 104470892-104470977,+ | 0.91      | m       | h r          | h r | h r | mmu-mir-376b   |                   |
| MP-39 | chr12        | 104475507-104475588,+ | 0.89      | m       | h r          | h r | -   | mmu-mir-381    | B212, X199        |
| MP-40 | chr12        | 104476303-104476376,+ | 1.03      | h       | h r          | h r | -   | mmu-mir-381    | B213, X177        |
| MP-41 | chr12        | 104477505-104477568,+ | 0.19      | -       | h r          | h r | -   | mmu-mir-381    | B214              |
| MP-42 | chr12        | 104483072-104483152,+ | 1.68      | m       | h r          | h r | h r | mmu-mir-134    | B217, X23         |
| MP-43 | chr12        | 104487293-104487371,+ | 1.41      | -       | h r          | h r | r   | mmu-mir-154    | B219, X161        |
| MP-44 | chr12        | 104490583-104490672,+ | 0.49      | m       | r            | r   | r   | mmu-mir-409    |                   |
| MP-45 | chr12        | 104491592-104491670,+ | 0.76      | h m     | h r          | h r | h   | mmu-mir-412    | B222              |
| MP-46 | chr13        | 109978142-109978233,+ | 0.8       | -       | h r          | h r | -   | mmu-mir-449    |                   |
| MP-47 | chr14        | 56583977-56584048,+   | 0.02      | -       | r            | r   | r   | mmu-mir-124a-1 |                   |
| MP-48 | chr15        | 82530668-82530751,+   | 0.87      | -       | r            | -   | -   | mmu-mir-33     |                   |
| MP-49 | chr16        | 24680520-24680593,+   | 0.53      | -       | -            | -   | -   | mmu-mir-28     |                   |
| MP-50 | chr16        | 77953522-77953626,+   | 0.74      | -       | h r          | h r | h   | mmu-mir-99a    |                   |
| MP-51 | chr17        | 16473418-16473539,+   | 0.58      | -       | r            | r   | -   | mmu-mir-99b    |                   |
| MP-52 | chr18        | 62164083-62164186,-   | 0.17      | -       | r            | r   | -   | mmu-mir-145    |                   |
| MP-53 | chr19        | 6053317-6053411,+     | 1.8       | -       | -            | -   | -   | mmu-mir-192    |                   |
| MP-54 | chrX         | 5530237-5530320,-     | 0.86      | -       | h r          | h r | -   | mmu-mir-188    | B122              |
| MP-55 | chrX         | 5544605-5544684,-     | 0.5       | -       | h r          | r   | -   | mmu-mir-188    |                   |
| MP-56 | chrX         | 45088040-45088119,-   | 0.24      | h m     | h r          | h r | -   | mmu-mir-19b-2  | X216              |
| MP-57 | chrX         | 45572242-45572319,-   | 1.19      | -       | h r          | h   | h   | mmu-mir-450    |                   |
| MP-58 | chrX         | 45572542-45572610,-   | 0.44      | h       | h r          | h r | -   | mmu-mir-450    | X138              |
| MP-59 | chrX         | 45573646-45573730,-   | 0.42      | h m r   | h r          | h r | h r | mmu-mir-450    |                   |
| MP-60 | chrX         | 45578227-45578297,-   | 0.6       | m r     | h r          | h r | -   | mmu-mir-322    | X141              |
| MP-61 | chrX         | 59554721-59554798,-   | 0.92      | m       | r            | r   | -   | mmu-mir-201    |                   |
| MP-62 | chrX         | 59563306-59563373,-   | 0.11      | -       | r            | -   | -   | mmu-mir-201    |                   |
| MP-63 | chrX         | 63820617-63820683,-   | 0.04      | h       | h            | h   | -   | mmu-mir-224    | X154              |
| MP-64 | chrX         | 96740883-96740952,-   | 0.19      | -       | -            | -   | -   | mmu-mir-384    |                   |
| MP-65 | chrX         | 104392971-104393058,- | 1.05      | -       | r            | -   | -   | mmu-mir-361    |                   |
| MP-66 | chrUn random | 95645494-95645572,-   | 1.14      | m       | r            | r   | r   | mmu-mir-292    |                   |
