# Supplementary material for: Identification of clustered microRNAs using an ab initio prediction method
Source: PubMed Central journal article supplement (PMC1315341; doi:10.1186/1471-2105-6-267), 2005-11-07
Supplement: 1471-2105-6-267-S3.pdf [file 1471-2105-6-267-S3.pdf]

| Name  | Chromosome | Genomic coordinates   | SVM score | Cloning | Conservation |     |     | Closest miRNA  | Other predictions |
|-------|------------|-----------------------|-----------|---------|--------------|-----|-----|----------------|-------------------|
| RP-1  | chr1       | 56485513-56485591,+   | 0.03      | -       | h m          | m   | -   | rno-mir-99b    |                   |
| RP-2  | chr1       | 64351073-64351153,-   | 1.25      | -       | -            | -   | -   | rno-mir-290    | L290              |
| RP-3  | chr1       | 64351438-64351513,-   | 0.36      | -       | m            | -   | -   | rno-mir-290    |                   |
| RP-4  | chr1       | 78621631-78621710,+   | 0.17      | -       | m            | -   | -   | rno-mir-330    |                   |
| RP-5  | chr1       | 78623834-78623909,+   | 0.06      | -       | m            | -   | -   | rno-mir-330    |                   |
| RP-6  | chr1       | 95669980-95670053,+   | 0.23      | -       | m            | -   | -   | rno-mir-150    |                   |
| RP-7  | chr1       | 95670581-95670654,+   | 0.09      | -       | m            | -   | -   | rno-mir-150    |                   |
| RP-8  | chr1       | 95677900-95677977,+   | 0.24      | -       | -            | -   | -   | rno-mir-150    |                   |
| RP-9  | chr1       | 116101847-116101913,- | 0.11      | -       | m            | -   | -   | rno-mir-344    |                   |
| RP-10 | chr1       | 118729804-118729885,+ | 0.07      | -       | m            | m   | m   | rno-mir-211    |                   |
| RP-11 | chr1       | 232943460-232943537,+ | 0.53      | -       | m            | -   | -   | rno-mir-101b   |                   |
| RP-12 | chr1       | 238976094-238976179,- | 1.08      | -       | h m          | m   | -   | rno-mir-107    |                   |
| RP-13 | chr2       | 44351863-44351934,+   | 0.09      | -       | m            | -   | -   | rno-mir-449    |                   |
| RP-14 | chr3       | 4776371-4776446,+     | 0.02      | -       | m            | m   | -   | rno-mir-126    |                   |
| RP-15 | chr3       | 8825965-8826040,-     | 0.12      | -       | m            | m   | -   | rno-mir-219-2  |                   |
| RP-16 | chr3       | 8826355-8826426,-     | 0.12      | -       | h m          | -   | -   | rno-mir-219-2  |                   |
| RP-17 | chr3       | 8836204-8836279,-     | 0.13      | -       | h m          | m   | m   | rno-mir-219-2  |                   |
| RP-18 | chr3       | 18555202-18555275,+   | 0.31      | -       | m            | m   | -   | rno-mir-181a   |                   |
| RP-19 | chr3       | 67845233-67845310,-   | 0.35      | -       | m            | m   | -   | rno-mir-130a   |                   |
| RP-20 | chr3       | 67854618-67854691,-   | 0.06      | -       | m            | -   | -   | rno-mir-130a   |                   |
| RP-21 | chr3       | 118900434-118900505,+ | 0.16      | -       | m            | -   | -   | rno-mir-103-2  |                   |
| RP-22 | chr3       | 169917182-169917255,+ | 0.36      | -       | -            | -   | -   | rno-mir-124a-3 |                   |
| RP-23 | chr5       | 74811172-74811258,-   | 0.42      | -       | m            | -   | -   | rno-mir-32     |                   |
| RP-24 | chr5       | 122003543-122003652,- | 4.13      | -       | -            | -   | -   | rno-mir-101    |                   |
| RP-25 | chr5       | 141361542-141361623,- | 0.64      | -       | m            | -   | -   | rno-mir-30c-1  |                   |
| RP-26 | chr5       | 141373038-141373110,- | 0.21      | -       | h m          | h m | m   | rno-mir-30e    |                   |
| RP-27 | chr5       | 172919255-172919345,- | 0.1       | -       | h m          | h m | h   | rno-mir-200b   |                   |
| RP-28 | chr6       | 133180935-133181008,+ | 0.04      | -       | h m          | h m | h m | rno-mir-345    |                   |
| RP-29 | chr6       | 134176527-134176610,+ | 1.69      | h       | h m          | h m | m   | rno-mir-337    | X52               |
| RP-30 | chr6       | 134183220-134183303,+ | 0.58      | m       | h m          | h m | h m | rno-mir-127    |                   |
| RP-31 | chr6       | 134216381-134216459,+ | 0.77      | h m     | h m          | h m | h m | rno-mir-341    |                   |
| RP-32 | chr6       | 134394385-134394469,+ | 0.27      | h m     | h m          | h m | h m | rno-mir-329    |                   |
| RP-33 | chr6       | 134401055-134401137,+ | 1.57      | h       | m            | m   | m   | rno-mir-300    | X61               |
| RP-34 | chr6       | 134401405-134401476,+ | 0.56      | -       | h m          | h m | h   | rno-mir-300    |                   |
| RP-35 | chr6       | 134403345-134403424,+ | 1.12      | h       | h m          | h m | h m | rno-mir-300    | X202              |
| RP-36 | chr6       | 134409396-134409480,+ | 0.41      | -       | h m          | h m | h m | rno-mir-300    |                   |
| RP-37 | chr6       | 134409711-134409794,+ | 1.2       | m       | h m          | h m | h m | rno-mir-300    |                   |
| RP-38 | chr6       | 134410367-134410452,+ | 1.88      | m       | h m          | h m | -   | rno-mir-300    | X205              |
| RP-39 | chr6       | 134410877-134410958,+ | 0.92      | h m     | h m          | h m | h   | rno-mir-134    |                   |
| RP-40 | chr6       | 134413887-134413947,+ | 0.08      | h       | h m          | h m | m   | rno-mir-134    |                   |
| RP-41 | chr6       | 134414396-134414477,+ | 0.89      | h       | h m          | h m | h m | rno-mir-134    | X199              |
| RP-42 | chr6       | 134415104-134415179,+ | 1.12      | h       | h m          | h m | m   | rno-mir-134    | X177              |
| RP-43 | chr6       | 134416447-134416510,+ | 0.32      | -       | m            | m   | m   | rno-mir-134    |                   |
| RP-44 | chr6       | 134416556-134416621,+ | 0.14      | -       | h m          | h m | -   | rno-mir-134    |                   |
| RP-45 | chr6       | 134421450-134421529,+ | 0.81      | h m     | m            | m   | m   | rno-mir-154    |                   |
| RP-46 | chr6       | 134422571-134422649,+ | 1.61      | m       | m            | -   | -   | rno-mir-154    | X23               |
| RP-47 | chr6       | 134426555-134426633,+ | 1.46      | -       | h m          | h m | -   | rno-mir-154    | X161              |
| RP-48 | chr6       | 134427956-134428039,+ | 1.46      | h m     | h m          | h m | h m | rno-mir-154    |                   |
| RP-49 | chr6       | 134429927-134430016,+ | 1.39      | m       | m            | m   | -   | rno-mir-154    |                   |
| RP-50 | chr6       | 134430691-134430767,+ | 0.77      | h m     | h m          | h m | -   | rno-mir-154    |                   |
| RP-51 | chr6       | 134430965-134431043,+ | 0.67      | h m     | m            | -   | -   | rno-mir-154    |                   |
| RP-52 | chr6       | 144523740-144523813,+ | 0.33      | -       | m            | m   | m   | rno-mir-153    |                   |
| RP-53 | chr7       | 31103016-31103110,-   | 0.83      | -       | h m          | h m | m   | rno-mir-331    |                   |
| RP-54 | chr7       | 31113223-31113298,-   | 0.06      | -       | h m          | m   | -   | rno-mir-331    |                   |
| RP-55 | chr7       | 105855778-105855851,- | 0.04      | -       | -            | -   | -   | rno-mir-30d    |                   |
| RP-56 | chr7       | 105858098-105858171,- | 0.03      | -       | -            | -   | -   | rno-mir-30d    |                   |
| RP-57 | chr7       | 120613557-120613657,+ | 0.79      | -       | m            | -   | -   | rno-mir-33     |                   |
| RP-58 | chr8       | 71573210-71573289,-   | 0.54      | -       | m            | -   | -   | rno-mir-190    |                   |
| RP-59 | chr8       | 94715612-94715679,-   | 0.03      | -       | m            | -   | -   | rno-mir-184    |                   |
| RP-60 | chr8       | 124000726-124000803,+ | 0.63      | -       | m            | -   | -   | rno-mir-26a    |                   |
| RP-61 | chr8       | 124008840-124008920,+ | 0.59      | -       | m            | -   | -   | rno-mir-26a    |                   |
| RP-62 | chr9       | 19403192-19403268,+   | 1         | m r     | m            | m   | -   | rno-mir-206    | L133              |
| RP-63 | chr9       | 73886715-73886788,+   | 0.09      | -       | m            | m   | -   | rno-mir-26b    |                   |
| RP-64 | chr10      | 20489742-20489826,+   | 0.34      | -       | m            | m   | -   | rno-mir-218-2  |                   |
| RP-65 | chr10      | 62803973-62804046,+   | 0.24      | -       | m            | -   | -   | rno-mir-22     |                   |

|        |       |                       |      |       |     |     |     |               |            |
|--------|-------|-----------------------|------|-------|-----|-----|-----|---------------|------------|
| RP-66  | chr10 | 64143143-64143210,+   | 0.56 | h m   | m   | -   | -   | rno-mir-144   | B919, X65  |
| RP-67  | chr10 | 64148879-64148959,+   | 0.69 | -     | m   | -   | -   | rno-mir-144   |            |
| RP-68  | chr10 | 74887785-74887858,-   | 0.23 | -     | m   | m   | -   | rno-mir-21    |            |
| RP-69  | chr10 | 85614388-85614461,+   | 0.13 | -     | m   | -   | -   | rno-mir-152   |            |
| RP-70  | chr10 | 85620609-85620682,+   | 0.13 | -     | m   | -   | -   | rno-mir-152   |            |
| RP-71  | chr13 | 40923138-40923237,+   | 0.11 | -     | m   | -   | -   | rno-mir-128a  |            |
| RP-72  | chr13 | 40923354-40923429,+   | 0.06 | -     | h m | -   | -   | rno-mir-128a  |            |
| RP-73  | chr14 | 67635179-67635254,-   | 0.49 | -     | m   | -   | -   | rno-mir-218-1 |            |
| RP-74  | chr14 | 67646626-67646689,-   | 0.44 | -     | m   | -   | -   | rno-mir-218-1 |            |
| RP-75  | chr15 | 33061966-33062039,-   | 0.09 | -     | -   | -   | -   | rno-mir-208   |            |
| RP-76  | chr15 | 50851770-50851843,+   | 0.15 | -     | h m | h m | h m | rno-mir-320   |            |
| RP-77  | chr15 | 50859666-50859770,+   | 0.35 | -     | h m | h m | h   | rno-mir-320   |            |
| RP-78  | chr18 | 2182016-2182089,-     | 0.03 | -     | h m | h m | m   | rno-mir-133a  |            |
| RP-79  | chr18 | 2191671-2191757,-     | 1.89 | m     | h m | h m | -   | rno-mir-133a  | L203       |
| RP-80  | chr18 | 16238116-16238208,-   | 0.65 | -     | h m | h m | h m | rno-mir-187   |            |
| RP-81  | chr18 | 16240916-16241012,-   | 3.2  | -     | m   | -   | -   | rno-mir-187   |            |
| RP-82  | chr18 | 27074044-27074117,-   | 0    | -     | -   | -   | -   | rno-mir-333   |            |
| RP-83  | chr18 | 27076891-27076964,-   | 0.32 | -     | m   | -   | -   | rno-mir-333   |            |
| RP-84  | chr18 | 57689589-57689662,-   | 0.23 | -     | m   | m   | -   | rno-mir-143   |            |
| RP-85  | chr18 | 57690454-57690526,-   | 0.27 | -     | m   | -   | -   | rno-mir-143   |            |
| RP-86  | chr18 | 61576948-61577025,+   | 0.01 | -     | m   | -   | -   | rno-mir-122a  |            |
| RP-87  | chr18 | 61578429-61578490,+   | 0.63 | -     | m   | -   | -   | rno-mir-122a  |            |
| RP-88  | chr18 | 61584305-61584374,+   | 0.45 | -     | m   | -   | -   | rno-mir-122a  |            |
| RP-89  | chr19 | 25649163-25649264,-   | 0.57 | -     | h m | h m | h m | rno-mir-23a   |            |
| RP-90  | chr19 | 37421397-37421475,+   | 0.06 | -     | m   | m   | -   | rno-mir-140   |            |
| RP-91  | chr20 | 4972613-4972686,+     | 0.04 | -     | m   | m   | -   | rno-mir-219-1 |            |
| RP-92  | chrUn | 25516733-25516880,-   | 1.55 | -     | m   | -   | -   | -             |            |
| RP-93  | chrX  | 31110201-31110285,-   | 0.1  | -     | m   | -   | -   | rno-mir-448   |            |
| RP-94  | chrX  | 41434223-41434298,+   | 0.03 | -     | m   | m   | m   | rno-mir-98    |            |
| RP-95  | chrX  | 91629279-91629352,-   | 0.39 | -     | h m | h m | m   | rno-mir-421   |            |
| RP-96  | chrX  | 91635942-91636015,-   | 0.03 | -     | m   | -   | -   | rno-mir-421   |            |
| RP-97  | chrX  | 91637005-91637072,-   | 1.05 | h m r | m   | m   | -   | rno-mir-421   | X257       |
| RP-98  | chrX  | 93560933-93561017,-   | 0.29 | -     | m   | m   | -   | rno-mir-325   |            |
| RP-99  | chrX  | 139814084-139814170,- | 0.88 | h m r | m   | m   | -   | rno-mir-19b-2 | X211       |
| RP-100 | chrX  | 139814504-139814575,- | 1.01 | h m r | m   | m   | -   | rno-mir-19b-2 | X216       |
| RP-101 | chrX  | 140069623-140069701,- | 0.53 | h m r | h m | h m | -   | rno-mir-322   | B972       |
| RP-102 | chrX  | 140070350-140070436,- | 2.3  | -     | m   | -   | -   | rno-mir-322   |            |
| RP-103 | chrX  | 140073303-140073373,- | 0.78 | m r   | m   | m   | -   | rno-mir-322   | B973, X141 |
| RP-104 | chrX  | 140079627-140079696,- | 0.25 | -     | m   | -   | -   | rno-mir-322   |            |
| RP-105 | chrX  | 140080694-140080788,- | 0.29 | -     | -   | -   | -   | rno-mir-322   |            |
