# Supplementary material for: Identification of clustered microRNAs using an ab initio prediction method
Source: PubMed Central journal article supplement (PMC1315341; doi:10.1186/1471-2105-6-267), 2005-11-07
Supplement: 1471-2105-6-267-S4.pdf [file 1471-2105-6-267-S4.pdf]

| Name  | Arm | Mature miRNA sequence  | Cloning frequency | Pre-miRNA genomic coordinates | Pre-miRNA secondary structure                                                                                                                                                                 | SVM score | Homologs (mismatches<6)                                          |
|-------|-----|------------------------|-------------------|-------------------------------|-----------------------------------------------------------------------------------------------------------------------------------------------------------------------------------------------|-----------|------------------------------------------------------------------|
| HP-30 | 3   | UGAAGGUUCUACUGUGGCCAG  | 2(h)              | chr14, 100405160-100405230, + | <pre>       U          CAUUC  U GGGCUU GUACAUGGUAGGCUUUCAUU  GU U CCC<del>CGA</del> <del>CGUGUGCAUCUGGAAGUGG</del>  CA G       C          CUUA-  C </pre>                                     | 0.12      | hsa-mir-493*(0)<br>RP-29(0)<br>MP-32(0)                          |
| HP-31 | 5   | UCUUGGAGUAGGUCAUUGGGU  | 3(h)              | chr14, 100420573-100420666, + | <pre> U - C      UCU  UA      G  A  UCUAUUU GA CU CUCCAGG  UGGAG  GGUCAUU  GGUGG  UCC  \ CU GA GAGGUUC  ACCUC  UCGGUAG  UCACC  GGG      C A  A  U      UGU  C-  G  -  UGCAUUC </pre>          | 1.27      | hsa-mir-432(0)                                                   |
| HP-33 | 3   | AACACACCUGGUUAACCUCUU  | 2(h)              | chr14, 100562875-100562954, + | <pre>       CU          UU  UG  UUC  U  AA GGUAC  GAAGAGAGG  C  GGU  UGUUUC  UU  U CUAUG  CUUU<del>UCUCCA</del>  G  CCA  <del>ACAAAG</del>  AG  G       AC          UU  GU  C--  C  GA </pre> | 1.29      | HP-34(0)<br>hsa-mir-329-1(0)<br>mmu-mir-329(4)<br>rno-mir-329(4) |
| HP-34 | 3   | AACACACCUGGUUAACCUCUU  | 2(h)              | chr14, 100563199-100563264, + | <pre>       UU  UG  UUC  U  AU GAAGAGAGG  C  GGU  UGUUUC  UU  U CUUU<del>UCUCCA</del>  G  CCA  <del>ACAAAG</del>  AG  G       UU  GU  C--  C  GA </pre>                                       | 0.25      | HP-33(0)<br>hsa-mir-329-2(0)<br>mmu-mir-329(4)<br>rno-mir-329(4) |
| HP-35 | 3   | UGAAACAUCACGGGAAACCU   | 1(h)              | chr14, 100565724-100565804, + | <pre>       C          GU  -  C  -  UUUU GAUACU  GAAGGAGAGG  CCGUGU  UGU  UUC  UC  \ CUAUGA  UUUUUUC<del>CCAA</del>  GGCACA  ACA  AAG  AG  G       -          AG  U  -  U  UAUU </pre>        | 1.4       | hsa-mir-494(0)<br>MP-35(0)<br>RP-33(0)                           |
| HP-37 | 3   | AUCAUAGAGGAAAAUCCACG   | 1(h)              | chr14, 100576159-100576238, + | <pre>       U  G  A      U      --  GU GGUAUU  AAAA  GU  GAUUUCCU  CUAUGGUUA  CGU  \ CUAUGA  UUUU  CA  C<del>UAAAAGGA</del>  GAUACUAAU  GUA  U       C      G  C      -  UG  GU </pre>        | 1.31      | hsa-mir-376a(0)<br>mmu-mir-376a(1)<br>RP-39(1)                   |
| HP-40 | 3   | AAUCGUACAGGGUCAUCCACUU | 3(h)              | chr14, 100582545-100582628, + | <pre> U      UG      UUAU      CCU  UUUUG UGGUACU  GAGAGUGG  CCCUGU  GUUCG  C ACUAUGA  UUUUCACC  GGGACA  UAAGC  U A      CU      UACU      UGC  UGUAC </pre>                                  | 1.28      | MP-39(0)<br>RP-41(0)                                             |
| HP-41 | 5   | GGAGAAUUAUCCUUGGUGUGU  | 2(h)              | chr14, 100583411-100583488, + | <pre>       UG          A      G  -  C  UAU AUACU  AGGAGAAUU  UCCUUG  UGUG  UUCG  UU  \ UAUGA  UUUUCUUUAA  AGGAAC  AUAC  AAGU  AG  U       GU          C      -  U  -  UAU </pre>             | 1.17      | MP-40(0)<br>RP-42(0)                                             |
| HP-42 | 3   | AUUCUGCAUUUUUAGCAAGU   | 1(h)              | chr14, 100584748-100584838, + | <pre> AUUUU      CUA  U      -  U  GA-  C CAUCAC  GGA  CUUGUUAAAAA  GCAGA  UCU  UU  A GUAGUG  CUCU  GAACGAUUUUU  CGUCU  AGA  AG  G UAAUC      AA-  U      A      U  ACC  G </pre>             | 0.3       | MP-41(1)<br>RP-43(1)                                             |
| HP-44 | 3   | AAUCAUACAGGGACAUCCAGU  | 1(h)              | chr14, 100588536-100588615, + | <pre>       U  G  UUA  C  -  C  AU GGUACU  GAAGA  UGG  UCCUG  UGUG  UUCG  UUA  \ CUAUGA  UUUU  ACC  AGGGAC  AUAC  AAGC  AGU  U       C      G  UAC  -  U  -  AU </pre>                        | 1.11      | hsa-mir-487(0)<br>HP-40(3)<br>MP-39(3)<br>RP-38/41(3)            |
| HP-45 | 5   | AGAGGCUGGCCGUGAUGAAUUC | 1(m)              | chr14, 100591505-100591585, + | <pre> U  GU  UG      CU  -  A  AUUCA G  ACU  GAGAGAGG  GGCCGUG  AUGA  UUCG  \ C  UGA  UUCUCUCC  UCGGCAC  UACU  GAGC  U A  UG  UU      UC      A  -  GAAAC </pre>                              | 1.41      | hsa-mir-485(0)<br>mmu-mir-485(0)<br>MP-42(0)<br>RP-46(0)         |

|       |   |                        |            |                               |                                                                                                                                                                 |      |                                                         |
|-------|---|------------------------|------------|-------------------------------|-----------------------------------------------------------------------------------------------------------------------------------------------------------------|------|---------------------------------------------------------|
| HP-47 | 5 | AGGUUACCCGAGCAACUUUG   | 3(h)       | chr14, 100601390-100601468, + | U U GG A AC - CA UG<br>GGUAC CG GAG GGUU CCGAGCAAC UUUG UC \<br>CUAUG GC UUC CCAA GGCUCGUUG AAGC AG G<br>A - UU C GU U -- CA                                    | 0.74 | hsa-mir-409(0)<br>mmu-mir-409(0)<br>RP-50(0)            |
|       | 3 | CGAAUGUUGCUCGGUGAACCCC | 1(h), 1(m) |                               | A C U AA - U<br>GGAUGG UGGU GACCAG UGG AGUA AUUG U<br>CCUGCC AUCA CUGGUC ACU UCAU UAAU U<br>G C C -- G C                                                        |      |                                                         |
| HP-48 | 3 | UUCACCCUGGUCACUAGCC    | 1(m)       | chr14, 100601548-100601614, + | C G UG A A C UUA<br>GGUAC UGAGAA AGGU UCUGUG UG GUUCG UU U<br>CCAUG ACUUUU UCCG AGACAC AU UAAGC AG U<br>- G GU A A - UAA                                        | 0.78 | hsa-mir-410(0)<br>mmu-mir-410(0)<br>RN-8(0)             |
| HP-49 | 3 | AAUAUAACACAGAUGGCCUG   | 3(h), 1(m) | chr14, 100602002-100602081, + | GU U GU G A AG UUAU<br>GUG CUCAGAA CGGG UUUGAGGC AG UG U \<br>UAC GGGUUUU GCCC AAACUCCCG UC AC A G<br>UG C UG G A CU UUUU                                       | 1.25 | hsa-mir-193b(0)<br>mmu-mir-193(4)<br>rno-mir-193(4)     |
| HP-61 | 5 | AAACCGUUACCAUUACUGAGU  | 6(h), 5(m) | chr17, 24212514-24212583, -   | U A GA A<br>UGGG AUGGCAAG AACCGUUACCAUUACUG G<br>ACCC UAUCGUUC UUGGUAUUGGUAUUGAU U<br>G A UC U                                                                  | 0.83 | hsa/mmu/mo-<br>mir-451(0)<br>MP-28(0)<br>RP-66(0)       |
| HP-77 | 5 | AAUCCUUGGAACCUAGGUGUGA | 1(h), 1(m) | chrX, 49476605-49476676, +    | - ACC A- UG AU<br>CCUCUU GAUCCUUGGA UAGGUGUG G CU \<br>GGAGAA CUUAGGAACUU AUCCACAC C GA U<br>A --- AA GU CU                                                     | 0.32 | hsa-mir-362(0)<br>MN-9(0)                               |
| HP-80 | 3 | AUCAGCAAACAUUUAUUGUGUG | 2(h)       | chrX, 73289960-73290065, -    | CCCAG ---- A -- CU- A A AUAAAA<br>CCUG GC CAU UAGUAGGC CAGUAAAUUUU UU GAUGA \<br>GGAC CG GUG AUCGUCCG GUUAUUUACAAA GA CUACU G<br>----- ACCU A AA UGU C - CAGUAA | 2.01 | HN-9(5)                                                 |
| HP-85 | 5 | CGGGUGGAUCACGAUGCAAUUU | 1(h)       | chrX, 133028921-133029009, -  | U GU CA A GAUGAGUA<br>GUUUUGC GUU CGGGUGGAU CG UGCAAUUUU U<br>CAGGACG CAA GUCUACCUA GC ACGUUA AAA C<br>C AU UG - AGAGGAUA                                       | 1.14 | hsa-mir-363(0)<br>mmu-mir-363(0)<br>MN-8(0)<br>RP-99(0) |
|       | 3 | AAUUGCACGGUAUCCAUCUGU  | 5(h), 1(m) |                               | U UUU U AAU<br>GAUGC AAACUAU UGCGA GUGUUCUAAUAUGU \<br>CUAUG UUUGAUA ACGUU UACAGGGUUUUGUA A<br>U CUU U AAU                                                      |      |                                                         |
| HP-86 | 5 | UUUUGCGAUGUGUUCUAAU    | 1(h)       | chrX, 133400068-133400148, -  | A U G GU AU<br>UGCCCU GCAGCGGGAACAGU CU CA GAGCG \<br>AUGGGA CGUCGCUUUUGUUA GG GU CUCGU C<br>C U G -- GG                                                        | 0.8  | hsa-mir-503(0)<br>MP-60(1)<br>RP-103(1)                 |
| HP-87 | 5 | UAGCAGCGGGAACAGUUCUG   | 3(h)       | chrX, 133405878-133405948, -  | AA GU G A UUUGU<br>AGCACUUAC CU UUGCAGA GA ACUGAGAC \<br>UCUGAAUG GA AACGUCU CU UGACUCUG A<br>AA -- A C UAUCA                                                   | 1.02 | hsa-mir-452(0)<br>mmu-mir-452(0)<br>MP-63(0)            |
