# Supplementary material for: Identification of clustered microRNAs using an ab initio prediction method
Source: PubMed Central journal article supplement (PMC1315341; doi:10.1186/1471-2105-6-267), 2005-11-07
Supplement: 1471-2105-6-267-S5.pdf [file 1471-2105-6-267-S5.pdf]

| Name  | Arm | Mature miRNA sequence  | Cloning frequency | Pre-miRNA genomic coordinates | Pre-miRNA secondary structure                                                                                                                                                     | SVM score | Homologs (mismatches<6)                                       |
|-------|-----|------------------------|-------------------|-------------------------------|-----------------------------------------------------------------------------------------------------------------------------------------------------------------------------------|-----------|---------------------------------------------------------------|
| MP-5  | 3   | AAUUGCACUUAGCAAUGGUG   | 5(h), 3(m)        | chr3, 128025558-128025632, +  | <pre> -           CA      C      UUGAA AGG CCGUCACUGUUGCUAA  UGCAA UCUG   U UCC GGUAGUGGUAACGAUU  ACGUU AGGU   A A           UC      A      UAAAG </pre>                          | 0.78      | hsa-mir-367(0)                                                |
| MP-24 | 5   | AUGGUGGCACGGAGUC       | 1(m)              | chr10, 127120840-127120960, + | <pre> .-.AAAA - - U U --- C U UA CCUCUCUCCC   CUA AA CA GGA CUA CAU  GGUGGCA GGAG CAGC \ GGAGAGGAGGG   GAUUU GU CCU GAU GUG  CUAUCGU UCUC GUUG  G \ --- U A U C UCC - U UA </pre> | 0.9       | hsa-mir-205(5)<br>mmu-miR-205(5)<br>rno-mir-205(5)<br>RN-3(5) |
| MP-28 | 5   | AAACCGUUACCAUUACUGA    | 6(h), 5(m)        | chr11, 77685721-77685807, +   | <pre> U   U---- AU   GA   A GGCAC   UGGGA  GCGGAG  AACCGUUACCAUUACUG  G CCGUG   ACCCU  UCGUUC  UUGGCAAUGGUAAUGAU  U A   UCAAAC   CG   UC   U </pre>                               | 1.19      | hsa/mmu/rno-<br>mir-451(0)<br>HP-61(0)<br>RP-66(0)            |
| MP-33 | 3   | AGGUCAGAGGUCGAUCCUGG   | 2(m)              | chr12, 104334262-104334328, + | <pre> A   AC   U   G-  A UGGGCC AGGGUC  CCUCUGAC  CUGU  GCC \ AUCCGG UCCUAG  GGAGACUG  GACA  UGG  A G   CU   -   GA  G </pre>                                                     | 0.18      | RP-30(0)                                                      |
| MP-34 | 5   | GCUCGACUCAUGGUUUGAACC  | 3(m)              | chr12, 104342700-104342775, + | <pre> A-  C  CUC  UG  UACU UUGAACCA  AG  UCGA  AUGGUU  AACCAU  U AGCUUGGU  UC  AGCU  UACCAA  UUGGUG  A CC - CAC  GU  CUUA </pre>                                                  | 0.61      | mmu-mir-434(0)<br>RN-4(0)                                     |
|       | 3   | UUUGAACCAUCACUCGACUC   | 1(m)              |                               |                                                                                                                                                                                   |           |                                                               |
| MP-35 | 3   | UGAAACAUAACACGGGAAACCU | 1(m)              | chr12, 104463492-104463576, + | <pre> U   U   GU   -  C  -  UUUA UGAUACU  GAAGGAGAGGUU  CCGUGU  UGU  UUC  UC  \ ACUAUGA  UUUUUUCUCCAA  GGCACA  ACA  AAG  AG  U A   -   AG   U   -  U  UAUU </pre>                 | 1.89      | hsa-mir-494(0)<br>HP-35(0)<br>RP-33(0)                        |
| MP-37 | 3   | AAACAUUCGCGGUGCACUUCU  | 1(m)              | chr12, 104465432-104465507, + | <pre> U   U   U   -  --  -  UUU GCU AA  GAGAAGU  GC  CCGCG  UGUUUU  UCGC  \ CGA UU  UUCUUA  CG  GCGCG  ACAAAAG  AGUG  A A   C  U   -  U   UU   C  UAU </pre>                      | 0.41      | HN-6(0)<br>RP-35(0)                                           |
| MP-38 | 3   | AACAUAAGAGGAAAUUCACG   | 2(m)              | chr12, 104470892-104470977, + | <pre> U   GU  U   G   UA   U   --  UU UUU  AUU  AAAA  GUGGA  UUCCU  CUAUGUUUA  UGC  \ AAC  UGA  UUUU  CACUU  AAGGA  GAUACAAAU  GUG  U A   UG  C   G   UA   -   UA  UU </pre>      | 0.91      | hsa-mir-368(2)<br>RP-37(0)                                    |
| MP-39 | 3   | AAUCGUACAGGGUCAUCCACU  | 3(m)              | chr12, 104475507-104475588, + | <pre> U   UG   UUAU  CCUC  -  UUCA GGUACU  GAGAGUGG  CCCUGU  UUUC  C  \ CUAUGA  UUUUCACC  GGGACA  AAGC  G  C A   CU   UACU  UGCU  C  UACU </pre>                                  | 0.89      | HP-40(0)<br>RP-41(0)                                          |
| MP-40 | 5   | GGAGAAUUUACCUUGGUGUGU  | 2(h)              | chr12, 104476303-104476376, + | <pre> UG           G   UUGGC  UU UACU  AGGAGAAUUUACCUUG  UGUG  UC  \ AUGA  UUUUUUUAAUAGGAAC  AUAC  AG  U GU           -  UAAGU  GU </pre>                                         | 1.03      | HP-41(0)<br>RP-42(0)                                          |
| MP-42 | 5   | AGAGGCUGGCCGUGAUGAAUUC | 1(m)              | chr12, 104483072-104483152, + | <pre> U   U   CU   -  A  AUUCA GAUACU  GGAGAGAGG  GGCCGUG  AUGA  UUCG  \ CUGUGA  CUUCUCUCC  UCGGCAC  UACU  GAGC  U A   U   UC   A   -  AAAUC </pre>                               | 1.68      | mmu-mir-485(0)<br>hsa-mir-485(0)<br>HP-45(0)<br>RP-46(0)      |

|       |   |                         |                     |                                       |                                                                                                                                              |      |                                                                    |
|-------|---|-------------------------|---------------------|---------------------------------------|----------------------------------------------------------------------------------------------------------------------------------------------|------|--------------------------------------------------------------------|
| MP-44 | 5 | AAGGGAUUCUGAUGUUGGUCACA | 6(m)                | chr12, 104490583-104490672, +         | <pre> A U AAG A G ----- C GCCA AA CAGAG GGAAUUCUG UGUU GUCAC ACUC \ CGGU UU GUCUC CCUAAGAC ACAA CGGUG UGAG A A C AUA - G AGUAAAAUUU A </pre> | 0.49 | RP-49(0)                                                           |
| MP-45 | 5 | AGAUCGACCGUGUUUAUUCG    | 2(h), 1(m)          | chr12, 104491592-104491670, +         | <pre> U AG UA CUU C GGUACU GA GGAGAUCGACCGUGU UAUUCG GG U CUAUGA CU UUUCUAGUUGGUACA AUAAGC UC G - CU UA U-- A </pre>                         | 0.76 | hsa-mir-369(0)<br>RP-51(0)                                         |
|       | 3 | AAUAAUACAUGGUUGAUCUU    | 2(h), 1(m)          |                                       |                                                                                                                                              |      |                                                                    |
| MP-56 | 5 | CAAAGUGCUCAUAGUGCAGGUA  | 5(h), 6(m)          | chrX, 45088040-45088119, -            | <pre> C U CA- G G UUUUUA CUAG AGUGC AAGUGCUGUA UGCAG UAG \ GGUC UCAUG UUCACGAGUGU ACGUC AUC U - C AUC G - UCACCA </pre>                      | 0.24 | hsa-mir-20b(0)<br>HN-14(0)<br>RP-100(0)                            |
| MP-58 | 5 | UUUUGCGAUGUGUCCUAAU     | 1(h)                | chrX, 45572542-45572610, -            | <pre> UUU U UACU GAACUUA UGCGA GUGUCCUAAUUG \ CUUGGUA ACGUU CGUAGGGUUUAU A CUU U GAGU </pre>                                                 | 0.44 | hsa-mir-450-1/2(0)<br>mmu-mir-450(0)<br>rno-mir-450(0)<br>HP-86(0) |
| MP-59 | 5 | CUCGGGGAUCAUCUGUCACG    | 2(h), 1(m),<br>2(r) | chrX, 45573646-45573730, -            | <pre> A GUC GG UCA A- C GG UCUCAGAC UCGG AUCA UGUCACGAG UAC A CC AGGGUCUG AGUC UAGU ACAGUGUUC GUG C G GAA AA UAG CC U </pre>                 | 0.42 | RP-101(0)                                                          |
|       | 3 | UGUGACAGAUUGAUACUGAAA   | 1(h), 1(m)          |                                       |                                                                                                                                              |      |                                                                    |
| MP-60 | 5 | UAGCAGCGGGAACAGUACUGC   | 6(m),4(r)           | chrX, 45578227-45578297, -            | <pre> UA C G UGA GUU UGCCC GCAG GGGAAACAGUACU CAG GU \ AUGGG CGUC CCUUUGUUUAUGA GUC CG U UC A G C-- UGG </pre>                               | 0.6  | hsa-mir-503(1)<br>HP-87(1)<br>RP-103(0)                            |
| MP-61 | 3 | CUUGGUACAUCUUUGAGUGA    | 3(m)                | chrX, 59554721-59554798, -            | <pre> A A UG CC UUAAC GUGUG UGU UCACU AGGAUGUACCA CAU A CACAC AUA AGUGA UUCUACAUGGU GUA G A G GU UC CAAAG </pre>                             | 0.92 |                                                                    |
| MP-63 | 5 | AACUGUUUGCAGAGGAAACUGA  | 1(h)                | chrX, 63820617-63820683, -            | <pre> UUACAA G G A UUUAU CU UUUGCAGA GA ACUGAGAC \ GA AAACGUCU CU UGACUCUG A AAUG-- G A C UAUCA </pre>                                       | 0.04 | mmu-mir-452(0)<br>hsa-mir-452(0)<br>HP-88(0)                       |
| MP-66 | 5 | GAUCAAGUGGAGGCCUCUC     | 4(m)                | chrUn_random,<br>95645494-95645572, - | <pre> UGU U G C C- GG ACAUACAG CGA CAAAGUGGA GC CU UCCGC C UGUGUGUC GUU GUUUUACCU CG GA GGGCG U UCU U A U AA GU </pre>                       | 1.14 | mmu-mir-291(1)<br>rno-mir-291(1)<br>mmu-mir-294(3)                 |
|       | 3 | AAAGUGCAUCCAUUUUGUUUGUC | 2(m)                |                                       |                                                                                                                                              |      |                                                                    |
