# Supplementary material for: Identification of clustered microRNAs using an ab initio prediction method
Source: PubMed Central journal article supplement (PMC1315341; doi:10.1186/1471-2105-6-267), 2005-11-07
Supplement: 1471-2105-6-267-S6.pdf [file 1471-2105-6-267-S6.pdf]

| Name  | Arm | Mature miRNA sequence  | Cloning frequency | Pre-miRNA genomic coordinates | Pre-miRNA secondary structure                                                                                                                                               | SVM score | Homologs (mismatches<6)                        |
|-------|-----|------------------------|-------------------|-------------------------------|-----------------------------------------------------------------------------------------------------------------------------------------------------------------------------|-----------|------------------------------------------------|
| RP-29 | 3   | UGAAGGUCUACUGUGGCCAG   | 2(h)              | chr6, 134176527-134176610, +  | <pre> CUC      U      CAU  U GGC CAGGGCCU GUACAUGGUAGGCUUUCAUU  UGU  U CCG  GUCCCCGA  CUGUGUCUAUCUGGAAGUGG  ACA  G U--      C      CUU  C </pre>                            | 1.69      | hsa-mir-493*(0)<br>HP-30(0)<br>MP-32(0)        |
| RP-30 | 3   | AGGUCAGAGGUCGAUCCUGG   | 2(m)              | chr6, 134183220-134183303, +  | <pre> UG  C  A  AC  U  G-  A CCC GGG UGGGCC AGGGUC CCUCUGAC CUGU GCC \ GGG CUC AUCCGG UCCTUAG GGAGACUG GACA UGG A GU  -  G  CU  -  GA  G </pre>                             | 0.58      | MP-33(0)                                       |
| RP-31 | 3   | GCCUGCUGGGUGGAACCUGG   | 3(h),3(m)         | chr6, 134216381-134216459, +  | <pre> G      CA  GU  U  U  A  GC AGACAGA AGACCAGGU C  CUC GCAG UAC CA \ UCUGUCU UUU<u>GGUCCA</u> G  GGG CGUC GUG GU  U G      AG  UG  U  C  A  AC </pre>                    | 0.77      | hsa-mir-370(0)<br>mmu-mir-370(0)               |
| RP-32 | 5   | UGGUAGACUAUGGAACGUA    | 3(h),4(m)         | chr6, 134394385-134394469, +  | <pre> U  UUC  C  G  A  GA  -  UUAU GG  CUG  AGAG  UGGU  GACUAUG  ACGUAGG  CG  \ CC  GAC  UCUC  AUCA  CUGGUAC  UGUAUCC  GU  G A  UAU  -  A  C  AA  A  CUUU </pre>            | 0.27      | hsa-mir-379(0)<br>mmu-mir-379(0)               |
| RP-33 | 3   | UGAAACAUCACGGGAACCU    | 1(h)              | chr6, 134401055-134401137, +  | <pre> U      U      GU  -  C  -  UUAU GAUACU GAAGGAGAGGU  CCGUGU UGU UUC UC  \ CUAUGA UUUUUUC<u>CCAA</u>  GGCACA ACA AAG AG  U A  -  AG  U  -  U  UAUU </pre>               | 1.57      | hsa-mir-494(0)<br>HP-35(0)<br>MP-35(0)         |
| RP-35 | 3   | AAACAUCGCGGUGCACUUCU   | 1(m)              | chr6, 134403345-134403424, +  | <pre> U  U  U  -  -  -  UUU GGUGCU AA GAGAAGU GC CCGCG UGUUUU UCGC \ CUACGA UU <u>UCUUCA</u> CG GCGCG <u>ACAAAG</u> AGUG  A C  U  -  U  UU  C  UAU </pre>                   | 1.12      | HN-6(0)<br>MP-37(0)                            |
| RP-37 | 3   | AACAUGAGGAAAUUUCACG    | 2(m)              | chr6, 134409711-134409794, +  | <pre> U  GU  U  G  UA  U  UGGUUAU UG  AUU  AAAA  GUGGA  UUCCU  CUAUGUUUA  \ AC  UGA  UUUU  <u>CACUU</u>  <u>AAGGA</u>  GAUACAAU  U A  UG  C  G  UA  -  UAGUAU </pre>        | 1.2       | hsa-mir-368(2)<br>MP-38(0)                     |
| RP-38 | 5   | GUGGAUUAUCCUUAUGGUU    | 2(m)              | chr6, 134410367-134410452, +  | <pre> U      U      A      U      CGUGCU UUGGUAUU AAAAG<u>GUGGAU</u> UUCCU CUAUGGUUA  \ AACUAUGA UUUU<u>CACCUA</u> AAGGA GAUACUAAU  U A      C      C      -  AGGUCC </pre> | 1.88      | mmu-mir-376b(0)<br>hsa-mir-376a(2)             |
|       | 3   | AUCAUAGAGGAACAUCCACU   | 1(m)              |                               |                                                                                                                                                                             |           |                                                |
| RP-39 | 5   | GGUAGAUUUCUUCUAUGAG    | 1(h),1(m)         | chr6, 134410877-134410958, +  | <pre> U      U  G  A  C  U  GUACAUAU GAUAUU AAAA GU GAUU UCCU CUAUGA  \ CUAUGA UUUU CA CUAA AGGA GAUGCU  U A      C  G  C  A  -  AAUCAGUAA </pre>                           | 0.92      | hsa-mir-376a(1)<br>mmu-mir-376a(0)<br>HP-37(1) |
|       | 3   | AUCGUAGAGGAAAUCCACG    | 2(m)              |                               |                                                                                                                                                                             |           |                                                |
| RP-40 | 3   | UAUACAAGGCAAGCUCUC     | 1(h)              | chr6, 134413887-134413947, +  | <pre> C  G  U  G  UUA AG GAG UUGCCCUU GUUAUUC GU  U UC  CUC  AACGGGA  CAUAUAGG UA  U U  G  -  G  CAG </pre>                                                                 | 0.08      | hsa/mmu-mir-381(0)<br>mmu/mo-mir-300(1)        |
| RP-41 | 3   | AAUCGUACAGGUCAUCCACU   | 3(h)              | chr6, 134414396-134414477, +  | <pre> U  UG  UUAU  CCUC  -  UUCA GGUACU GAGAGUGG  CCGUGU  UUCG C  \ CUAUGA UUUU<u>CACC</u>  GGCACA  AAGC G  C A  CU  <u>UACU</u>  <u>UGCU</u>  C  UAUU </pre>               | 0.89      | HP-40(0)<br>MP-39(0)                           |
| RP-42 | 5   | GGAGAAAUUAUCCUUGGUGUGU | 2(h)              | chr6, 134415104-134415179, +  | <pre> G  -  CU  U AUACUUGA<u>GGAGAAAUUAUCCUUG</u> UGUG UUG  C  U UAUGAGCUUUUCUUAAUUGGGAAC AUAC AAGU  G  U -  U  AG  U </pre>                                                | 1.12      | HP-41(0)<br>MP-40(0)                           |
| RP-45 | 5   | GAAGUUGUUCUGGUGGAUUC   | 1(h), 2(m)        | chr6, 134421450-134421529, +  | <pre> U      A-      UG  CU  C GGUACU GAAGAGA  GUUGUUCGUGG  GAUUCG  UUA  U CCAUGA CUUUUUU  CAACAGGCACU  CUAAGC  AGU  U -      CA      UA      -  G </pre>                   | 0.81      | hsa-mir-382(0)<br>mmu-mir-382(0)               |

|        |   |                         |                    |                              |                                                                                                                                      |      |                                                          |
|--------|---|-------------------------|--------------------|------------------------------|--------------------------------------------------------------------------------------------------------------------------------------|------|----------------------------------------------------------|
| RP-46  | 5 | AGAGGCUGGCCGUGAUGAAUUC  | 1(m)               | chr6, 134422571-134422649, + | U CU - A AUUCA<br>GAUACU GGAGAGAGG GGGCGUG AUGA UUCG \\<br>CUGUGA CUUCUCUCC UCGGCAC UACU GAGC U<br>U UC A - AAAUC                    | 1.61 | hsa-mir-485(0)<br>mmu-mir-485(0)<br>HP-45(0)<br>MP-42(0) |
| RP-48  | 5 | AGAGGUUGCCCUUGGUGAAUU   | 1(h)               | chr6, 134427956-134428039, + | U U UG G C - A - UUUU<br>UGAU CU A CAGAGGUUGCC UUG GUGA UUCG C \\<br>ACUA GA U GUUUCAACGG AAC CACU AAGU G U<br>A U GU G A A - U UAGU | 1.46 | HP-45(4),MP-42(4)<br>RP-46(4)                            |
|        | 3 | AAUCACACAAGGCAACUUUU    | 3(h),1(m)          |                              | hsa-mir-377(1)<br>mmu-mir-377(1)                                                                                                     |      |                                                          |
| RP-49  | 5 | AAGGGAUUCUGAUGUUGGUCACA | 6(m)               | chr6, 134429927-134430016, + | A U AAG A G ACUCCAAGAA<br>GCCA AA CAGAG GGAUUCUG UGUU GUCAC \\<br>CGGU UU GUCUC CCUAAGAC ACAA CGGUG U<br>A C AUA - G AGUAAAAUUU      | 1.39 | MP-44(0)                                                 |
| RP-50  | 5 | AGGUUACCCGAGCAACUUUG    | 3(h)               | chr6, 134430691-134430767, + | U A AC - CA UG<br>GGUAC CCGAGAG GGUU CCGAGCAAC UUG UC \\<br>CUAUG GCUUUUU CCAA GGCUCGUG AAGC AG G<br>- C GU U -- GA                  | 0.77 | hsa-mir-409(0)<br>mmu-mir-409(0)<br>HP-47(0)             |
|        | 3 | AAUGUUGCUCGGUGAACCCC    | 1(h),1(m)          |                              |                                                                                                                                      |      |                                                          |
| RP-51  | 5 | AGAUCGACCGUGUUAUUUCG    | 2(h),1(m)          | chr6, 134430965-134431043, + | U AG UA CUU C<br>GGUACU GA GGAGAUCGACCGUGU UAUUCG AG U<br>CUAUGA CU UUUUAGUUGGUACA AUAAGC UC G<br>- CU UA U-- A                      | 0.67 | hsa-mir-369(0)<br>MP-45(0)                               |
|        | 3 | AAUAAUACAUGGUUGAUCUU    | 2(h),1(m)          |                              |                                                                                                                                      |      |                                                          |
| RP-62  | 3 | UUUGGUCCCUUCAACCAGC     | 1(m),1(r)          | chr9, 19403192-19403268, +   | C CA C A U G C<br>CCUUCU UGGCUGGU AA GG ACCAAG CC UCUC \\<br>GGGACGA AUCGACCA UU CC UGGUUU GG AGAG C<br>C AC C C - U                 | 1    | hsa/mmu/rno-<br>mir-133a(0)<br>hsa/mmu-mir-133b(0)       |
| RP-66  | 5 | AAACCGUUACCAUUCUGAG     | 6(h),5(m)          | chr10, 64143143-64143210, +  | U AU GA A<br>GGGA GCGGAG AACCGUUACCAUUCUG G<br>CCCU UCGUUC UUGGUAAUGGUAAUGAU U<br>A CG UC U                                          | 0.56 | hsa/mmu/rno-<br>mir-451(0)<br>HP-61(0)<br>MP-28(0)       |
| RP-79  | 5 | GCACAUACUUUUUAUGUACCC   | 1(m)               | chr18, 2191671-2191757, -    | C AC UGAACA<br>UGCCUACUCAGAG ACAUACUUUUUAUGU CCAUA U<br>AUGGAUGGGUUUU UGUGAAGAAAUGUA GGUAU A<br>A A- CGUAG                           | 1.89 | mmu-mir-1-2*(0)                                          |
| RP-97  | 5 | AUAUAAUACAACCUGCUAAGU   | 3(h),5(m),<br>2(r) | chrX, 91637005-91637072, -   | UG AU C U<br>CUCGGA G AUAUACAAC UGCUAAGUGU C<br>GAGCCU U UAUUAGUUG ACGAUUCACG U<br>GU AU C A                                         | 1.05 | hsa-mir-374(2)                                           |
| RP-99  | 5 | CGGGUGGAUCACGAUGCAAUUU  | 1(h)               | chrX, 139814084-139814170, - | U AU CA A GA-- GA<br>UUUUGC GUU CGGGUGGAU CG UGCAAUUU UUA G<br>AGGACG CAA GUCUACCUA GC ACGUUAAAG GGU U<br>C AU UG - AGAG AA          | 0.88 | hsa-mir-363(0)<br>mmu-mir-363(0)<br>HP-85(0)<br>MN-8(0)  |
|        | 3 | AAUUGCAGCGUAUCCAUCUGU   | 5(h),1(m),<br>1(r) |                              |                                                                                                                                      |      |                                                          |
| RP-100 | 5 | CAAAGUCUCAUAGUCAGGU     | 4(h),5(m)          | chrX, 139814504-139814575, - | GU - G G - UUU<br>AGUGCCA AAGUGCUDAUA UGCAG UAG GU G<br>UCAUGGU UUCACGAGUGU ACGUC AUC CA C<br>C- C G - U CGU                         | 1.01 | hsa-mir-20b(0)<br>HN-14(0)<br>MP-56(0)                   |
|        | 3 | ACUGCAGUGUGAGCACUUCUG   | 3(r)               |                              |                                                                                                                                      |      |                                                          |
| RP-101 | 5 | CUCGGGAUCAUGUACACG      | 2(h),1(m),<br>2(r) | chrX, 140069623-140069701, - | GUC GG UCA AUACCA<br>UCUCAGAC UCGG AUCA UGUCACGAG \\<br>AGGGUCUG AGUC UAGU ACAGUGUUC C<br>GAA AA UAG ACGCGU                          | 0.53 | MP-59(0)                                                 |
|        | 3 | UGUGACAGAUUGAUAACUGAA   | 1(h),1(m)          |                              |                                                                                                                                      |      |                                                          |
| RP-103 | 5 | UAGCAGCGGGAACAGUACUG    | 6(m),4(r)          | chrX, 140073303-140073373, - | UA G UGA GUU<br>UGCC GCAGCGGGAACAGUACU CAG GU \\<br>AUGGG CGUCGCCUUUGUUAUGA GUC CG U<br>UC G C-- UGG                                 | 0.78 | hsa-mir-503(1)<br>HP-87(1)<br>MP-60(0)                   |
