# Supplementary material for: Identification of clustered microRNAs using an ab initio prediction method
Source: PubMed Central journal article supplement (PMC1315341; doi:10.1186/1471-2105-6-267), 2005-11-07
Supplement: 1471-2105-6-267-S7.pdf [file 1471-2105-6-267-S7.pdf]

| Name  | Arm | Mature miRNA sequence  | Cloning frequency | Pre-miRNA genomic coordinates | Pre-miRNA secondary structure                                                                                                    | SVM score | Homologs (mismatches<6)                               | Other predictions |
|-------|-----|------------------------|-------------------|-------------------------------|----------------------------------------------------------------------------------------------------------------------------------|-----------|-------------------------------------------------------|-------------------|
| HN-1  | 3   | ACCAACAUGGUGAAACCCU    | 1(m)              | chr3, 37995864-37995931, +    | <pre> UG UGGA - A- AUUUCA GAGG GG UCACC UG GGUCAGG \ CUCU CC AGUGG AC CCA GUCC A GU CAA- U AA GACCAG </pre>                      | -1.26     | HN-3(0)                                               |                   |
| HN-2  | 5   | CAGGGUUUCACCAUGUUGG    | 1(m)              | chr3, 52284705-52284776, -    | <pre> GUA A UUCAC UU CU CU GAGGC GGGU CAUG GGUCAGG GGU \ CUCCG CCCA GUGC CUAGUCC UCA U CGA - UCUA- U- -- AG </pre>               | -1.9      | hsa-mir-196a(4)<br>mmu-miR-196a(4)<br>rno-mir-196a(4) |                   |
| HN-3  | 3   | ACCAACAUGGUGAAACCCU    | 1(m)              | chr4, 8133205-8133274, -      | <pre> U UGGA UGA-- A-- C GAGGCAGG UCAUU GGUCAGG GUU \ CUCUGUCC AGUGG CCA GUCC CAG A A CAA- UACAA GAC A </pre>                    | -2.01     | HN-1(0)                                               |                   |
| HN-4  | 3   | ACCAGGAGGCGUAGGCCCC    | 2(h)              | chr14, 100411130-100411185, + | <pre> U ACC- G CU GAGGGGUCU GCCUCU CA GA \ CUCCCCGAG CGGAGG GU CU C U ACCA A UU </pre>                                           | -1.42     | MN-6(1)<br>RN-2(1)                                    |                   |
| HN-5  | 5   | UAGUAGACCGUAUAGCGUAC   | 1(h), 2(m)        | chr14, 100559430-100559483, + | <pre> A AUA C UAU UAGU GACCGU GCGUAC GU \ AUCA CUGGCA UGU AUGC AG C C CAA - UGU </pre>                                           | -0.78     | mmu-mir-411*(0)<br>RN-5(0)                            |                   |
| HN-6  | 3   | AAACAUUCCGGUGCACUUCU   | 1(m)              | chr14, 100568085-100568144, + | <pre> U - U-- U UUU GAGAAGU GC CCGUG UUUU UCGC \ UUCUUA CG GGC GC AAAG AGUG A - U UUAC C UUU </pre>                              | -1.63     | MP-37(0)<br>RP-35(0)                                  | B210, X202        |
| HN-7  | 5   | UGGUGGGCCGCAGAACAUUG   | 1 (h)             | chr14, 100576319-100576381, + | <pre> A GCC A - - A AAAG UGGUGG GCAGA CAUGUG C UG G UUUC ACUACC CGUCU GUAUAC G GC U C AGU - C U U </pre>                         | -0.13     | hsa-mir-380-5p(5)<br>mmu-miR-380-5p(5)                |                   |
|       | 3   | UAUGUCUGCUGACCAUCAC    | 1 (h)             |                               |                                                                                                                                  |           |                                                       |                   |
| HN-8  | 5   | AGGUUGUCCGUGGUGAGUUCGC | 1 (h)             | chr14, 100592317-100592383, + | <pre> U GUGAGUUC U GGAGGGAGGUUG CCGUG GCAUUUU \ CUUUUCUCCAGC GGCAC CGUAGUA U U AUAACC- - A </pre>                                | -1.17     | hsa-mir-453-3P(0)<br>RP-45/48(5)                      | ANMH-52           |
| HN-9  | 5   | GCAGCACACUGUGGUUUG     | 2(m)              | chr17, 6861984-6862041, -     | <pre> G C U -- AC AGCA CACA UGUGGUUUU AC GGC U UUGU GUGU ACACCAAAC UG CCG G G C C CA GU </pre>                                   | -0.06     | hsa-mir-497(0)<br>MN-5(0)<br>RN-10(0)                 | X43, ANMH64       |
| HN-10 | 3   | CAGUGCAAUGAUUUGCAAAGC  | 3(h)              | chr22, 20331820-20331903, +   | <pre> - G C G-- A GUGCU GCUGG CC CAGGUCU UGACGA GUUGCACU CU \ CGACC GG GUCUA CGA ACUGUU UAACGUGA GA C A - A AUAG C AGAGU </pre>  | -0.75     | hsa/mmu/rno-mir-301(2)                                | X220,<br>ANMH76   |
| HN-11 | 5   | UAUCCUUGCUACCUUGGGUGAG | 1 (h)             | chrX, 49476075-49476158, +    | <pre> CCC U- UAC UG AGAG UGUC GCUC CUCUC AAUCCUUGC C GGUG UGC \ CGAG GAGAG UAAGGAACG G CCAC ACG U AGC UC --- GU GUA- UAAG </pre> | -0.33     | hsa-mir-500(0)<br>HN-12-5(0)                          |                   |
| HN-12 | 5   | UAUCCUUGCUACCUUGGGUGAG | 1 (h)             | chrX, 49478315-49478394, +    | <pre> CUCU- UAC AGAG UUUC UCCCCCU AAUCCUUGC CUGGUG UGC \ AGGGGGA UAAGGAACG GACCAC ACG U ACGUC --- GUG- UAAG </pre>               | -0.33     | hsa-mir-500(0)<br>HN-11-5(0)                          |                   |

|       |   |                                     |            |                              |                                                                                                                                                   |       |                                         |      |
|-------|---|-------------------------------------|------------|------------------------------|---------------------------------------------------------------------------------------------------------------------------------------------------|-------|-----------------------------------------|------|
| HN-13 | 5 | UA <del>CC</del> CAUUGCAUAUCGGAGUUG | 2(h)       | chrX, 49480881-49480976, +   | <pre> U ACU- C CAUAC- U C U GAAUU GA GCUC UUCUCC CCAU GCAUUAU GGAG UGU \ CU CGAG GGGAGG GGUA CGUGUG CCUC ACA C A GUUC U ACAUUA - U C AAACU </pre> | -0.55 |                                         |      |
| HN-14 | 5 | CAAAGUGCUCUAUAGUGCAGGUA             | 5(h), 6(m) | chrX, 133029352-133029435, - | <pre> U U CA- G GU- UUG GUCC AG AGUAC AAGUGCUCUAU UGCAG AGUU \ UAGG UC UCAUG UUCACGGGUUUA AUGUC UCAG G U - ACC G AUC UAC </pre>                   | -0.91 | hsa-mir-20b(0)<br>MP-56(0)<br>RP-100(0) | X216 |
|       | 3 | ACUGUAGUAUGGGCACUCCAG               | 1 (h)      |                              |                                                                                                                                                   |       |                                         |      |
