# Supplementary material for: Identification of clustered microRNAs using an ab initio prediction method
Source: PubMed Central journal article supplement (PMC1315341; doi:10.1186/1471-2105-6-267), 2005-11-07
Supplement: 1471-2105-6-267-S8.pdf [file 1471-2105-6-267-S8.pdf]

| Name  | Arm | Mature miRNA sequence  | Cloning frequency | Pre-miRNA genomic coordinates | Pre-miRNA secondary structure                                                                                                    | SVM score | Homologs (mismatches<6)                                                           | Other predictions |
|-------|-----|------------------------|-------------------|-------------------------------|----------------------------------------------------------------------------------------------------------------------------------|-----------|-----------------------------------------------------------------------------------|-------------------|
| MN-1  | 3   | ACUUAGCUCACUUCUU       | 1(m)              | chr1, 23518215-23518296, +    | <pre> AAAG AG GG --- ACA-- UCCU AGUGAG GGG AAAGG AGA GAG UGAA \ UCACUU CUC UUUCC UCU CUC ACUU A GA-- GU UU UCA GAUUC CCAG </pre> | -1.75     | hsa/mmu/rno-mir-27b(5)<br>hsa/rno-mir-151(5)<br>mmu/rno-mir-329(5)<br>HP-33/34(5) | B463              |
| MN-2  | 3   | UAAGUGCUUCCAUGUUUUAG   | 1(h), 1(m)        | chr3, 128025063-128025120, +  | <pre> UU AU U G- UC ACU AACAUGGGA GCUU CU UC \ UGA UUGUACCU UGAA GA AG A UU CG U GA CU </pre>                                    | -0.96     | hsa-mir-302b(0)<br>hsa-mir-302a/c/d(1)<br>mmu-mir-302(1)                          |                   |
| MN-3  | 5   | ACAUUCAUUGUUGUCGGUGGGU | 1(m)              | chr8, 83449175-83449233, -    | <pre> G UG GUGA AG ACAUUCAU U UCGGUGGGU GG G UGUAAGUAG G GGCCACCCAG CC C G -- A--- GA </pre>                                     | -0.6      | hsa-mir-181d(0)<br>hsa/mmu/rno-mir-181b-1/2(1)                                    | X74               |
| MN-4  | 3   | AGCCAUCUCUCCAGCC       | 1(h)              | chr9, 106092117-106092176, +  | <pre> - AC A-- AGG C GCUGGGGCUGG GA UG GCUC UC U CGGCCCGACC CU AC CGAG GG C U CU CGA AA- G </pre>                                | -1.44     | hsa-mir-197(4)<br>rno-mir-349(4)                                                  |                   |
| MN-5  | 5   | AGCAGCACACUGUGUUUUGUA  | 2(m)              | chr11, 69847287-69847344, +   | <pre> G C U -- AC AGCA CACA UGUGUUUG AC GGC U UUGU GUGU ACACCAAAC UG CCG G G C C CA GU </pre>                                    | -0.06     | hsa-mir-497(0)<br>HN-9(0)<br>RN-10(0)                                             | X43               |
| MN-6  | 3   | ACCAGGAGGCUAGGUCCCUU   | 1(m)              | chr12, 104334502-104334581, + | <pre> U - U AUCCA A U GGGUC CCU UGAGGGGCUC GCCUCU GG UUAUG U UCCGG GGA AUUCCUGGAG CGGAGG CC AGUAU U C C U A---- - U </pre>       | -0.01     | HN-4(1)<br>RN-2(0)                                                                |                   |
| MN-7  | 3   | GGCUGCAGCGUGAUCGCCUG   | 2(m)              | chr12, 104465268-104465345, + | <pre> C - A-- - GAG - AG CCUG GUG GAGCGGC CA GCUGU AGCCCC CU G GGAC CGC CUCGUCCG GU CGACG UCGGGG GA U A A CUA G --- C CA </pre>  | -1.58     | RN-7(0)                                                                           |                   |
| MN-8  | 3   | AAUUGCACGGUAUCCAUCU    | 1(h)              | chrX, 45087626-45087688, -    | <pre> - A A GG GGUG CAGGUGGA AC CG UGCAUUUUU UU U GUCUACCU UG GC ACGUAAAA AG A A - - GG GAUA </pre>                              | -0.69     | mmu-mir-363(0)<br>hsa-mir-363(0)<br>HP-85(0)<br>RP-99(0)                          | B343, X211        |
| MN-9  | 5   | AAUCCUUGGAACCUAGGUGU   | 1(m)              | chrX, 5530957-5531028, -      | <pre> C- ACC AA U U CCUCU GAUCCUUGGA UAGGUGU UGC GC U GGAGA CUUAGGAACUU GUCCACAC ACG UG C AA --- A- - A </pre>                   | -0.61     | hsa-mir-362(0)<br>HP-77(0)                                                        | B121, X144        |
| MN-10 | 5   | CAUGCCUUGAGUGUAGGACCG  | 1(h), 1(m)        | chrX, 5537395-5537461, -      | <pre> C U A A CC UGACAU UCUU CA GCCUUG GUGU GGA GU \ AGGA GU CGGAAC CACA CCU CA C C U C C CC UUAUU </pre>                        | -0.13     |                                                                                   |                   |
|       | 3   | CCUCCACACCCAAGGCUUGC   | 1(h),2(m),1(r)    |                               |                                                                                                                                  | -0.13     |                                                                                   |                   |
