# Supplementary material for: Identification of clustered microRNAs using an ab initio prediction method
Source: PubMed Central journal article supplement (PMC1315341; doi:10.1186/1471-2105-6-267), 2005-11-07
Supplement: 1471-2105-6-267-S9.pdf [file 1471-2105-6-267-S9.pdf]

| Name  | Arm | Mature miRNA sequence | Cloning frequency | Pre-miRNA genomic coordinates | Pre-miRNA secondary structure                                                                                                                                                              | SVM score | Homologs (mismatches<6)                                                             | Other predictions |
|-------|-----|-----------------------|-------------------|-------------------------------|--------------------------------------------------------------------------------------------------------------------------------------------------------------------------------------------|-----------|-------------------------------------------------------------------------------------|-------------------|
| RN-1  | 5   | ACUCAAAUGUGGGCACACUU  | 1(m)              | chr1, 64350964-64351026, -    | <pre> G      U      -      AC      GAUU GA ACUCAAA GUGG GGCAC UU CUG \ CU UGGGUUU CAUC UCGUG AAGAU A G      U      A      A-      GCGU </pre>                                              | -0.33     | mmu-mir-295*(0)                                                                     | L290              |
| RN-2  | 3   | ACCAGGAGGCUGAGGUCCUU  | 1(m)              | chr6, 134183482-134183559, +  | <pre> U      -      U      AUCCA A      CU GGUC CCU UGAGGGGCCUC GCCUCU GG UUAU U CCGG GGA AUUCCUGGAG CGGAGG CC AGUA U C      C      U      A---- -      UU </pre>                          | -0.03     | HN-4(1)<br>MN-6(0)                                                                  |                   |
| RN-3  | 5   | AUCAUGAUGGGCUCUCGGUG  | 2(h), 1(m)        | chr6, 134189465-134189537, +  | <pre> GA---- UGA      -      C---- UC- AGG       UCA UGGGCU CCU GGUGU UCC \       GGU GCCCGA GGA CCACA AGG U CUAGGAA UAG      C      AGUA CCA CGA </pre>                                   | -1.81     | hsa/mmu/rno-<br>mir-433-3P(0)<br>MP-24(5)                                           |                   |
| RN-4  | 5   | GCUCGACUCAUGGUUUGAACC | 4(m)              | chr6, 134192432-134192513, +  | <pre> U      CUCU      UG      -      CUC UC      U GUCGA UGA UGGUU AACCAC AG GAC AUGGU U CAGCU ACU ACCAA UUGGUG UC CUG UA CCA G C      ----      GU      C      AAA      U-      A </pre> | -0.06     | mmu-mir-434(0)<br>MP-34(0)                                                          |                   |
| RN-5  | 5   | AUAGUAGACCGUAUAGCGUAC | 2(h), 4(m)        | chr6, 134395538-134395603, +  | <pre> AGA      A      AUA      C      UAU GAG UAGU GACCGU GCGUACG UU \ CUC AUCA CUGGCA UGUUAGC AG C CCA      C      CAA      -      UGU </pre>                                             | -0.5      | mmu-mir-411(0)<br>HN-5(0)                                                           |                   |
|       | 3   | UAUGUAACACGGUCCACUAA  | 1(m)              |                               |                                                                                                                                                                                            |           |                                                                                     |                   |
| RN-6  | 5   | AUGGUAGACCAUAGAACAUGC | 1(m)              | chr6, 134397179-134397245, +  | <pre> A      GUU      GA      C      U GA AAGAUG GACCAUA ACAUCCG UAC U CU UUCUAC CUGGUAU UGUUAGC GUG C C      AC-      GA      U      U </pre>                                             | -0.81     | hsa-mir-380(0)<br>mmu-miR-380(0)                                                    |                   |
| RN-7  | 3   | GGCUGCAGCUGAUCGCCUG   | 2(m)              | chr6, 134403226-134403284, +  | <pre> A-- -      GAG      -      AG AGCGGGC CG GCUGU AGCCCC CU G UCGUCCG GU CGACG UCGGGG GA U       CUA G      ---      C      CA </pre>                                                   | -2.11     | MN-7(0)                                                                             |                   |
| RN-8  | 3   | AAUAUAACACAGAUGGCCUGU | 3(h), 1(m)        | chr6, 134431273-134431338, +  | <pre> G      UG      A      A      C      UAU GAGGA AGGU UCUGUG UG GUUCG UU \ CUUUU UCCG AGACAC AU UAAGC AG U       G      GU      A      A      -      UAA </pre>                         | -0.39     | HP-49(0)<br>hsa-mir-410(0)<br>mmu-mir-410(0)                                        | X26               |
| RN-9  | 5   | GAUGGAAACUGAGAGGA     | 1(m)              | chr9, 22136907-22136975, +    | <pre> U      UU      C      A      AAAC      AG      G GGGG GGAGG UG UGG UGAGAGG GAUU \ CCCC CCUCC AC ACC ACUCUUC UUAG C A      U-      -      -      C---      GU      U </pre>           | -2.01     | hsa/mmu/rno-<br>mir-184(4)                                                          |                   |
| RN-10 | 5   | AGCAGCACACUGUGGUUUGUA | 2(m)              | chr10, 57087471-57087528, +   | <pre>       G      C      U      --      AC AGCA CACA UGUGGUUG AC GGC U UUUGU GUGU ACACCAAAC UG CCG G       G      C      C      CA      GU </pre>                                         | -0.06     | hsa-mir-497(0)<br>HN-9(0)<br>MN-5(0)                                                | X43               |
| RN-11 | 5   | CUUACAGUCAGGUA        | 1(h)              | chrX, 139814891-139814942, -  | <pre>       A      G      CU      U AAGUCU CAGUCAG UAG UC U UUACGAA GUCACGUC AUC AG G       C      -      U-      A </pre>                                                                 | -0.22     | hsa/mmu/rno-mir-17(0)<br>hsa/mmu/rno-mir-20(1)<br>hsa-mir-106a(0)<br>mm-mir-106a(1) | B971              |
